# Supplementary material for: The effectiveness of probiotics as an adjunct therapy in patients under mechanical ventilation: an umbrella systematic review and meta-analysis
Source: Royal Society of Chemistry journal article supplement (doi:10.1039/d3fo04653b), 2024-01-01
Supplement: d3fo04653b2.pdf [file d3fo04653b2.pdf]

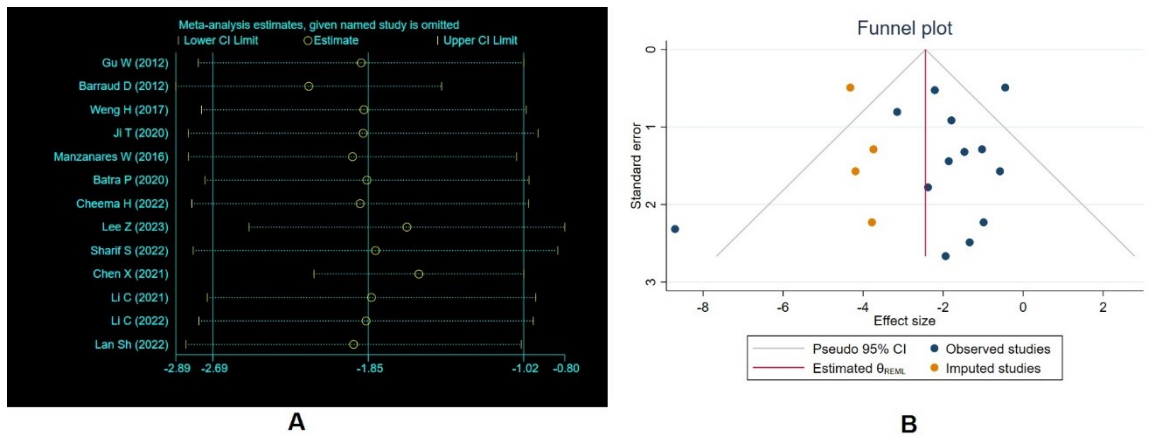

**Supplementary Fig. 3.** Sensitivity analysis regarding the effects of probiotics supplementation on hospital length of stay (**A**) and Trim and Fill analysis showing modified pooled WMDs regarding the effects of probiotics supplementation on hospital length of stay (**B**).

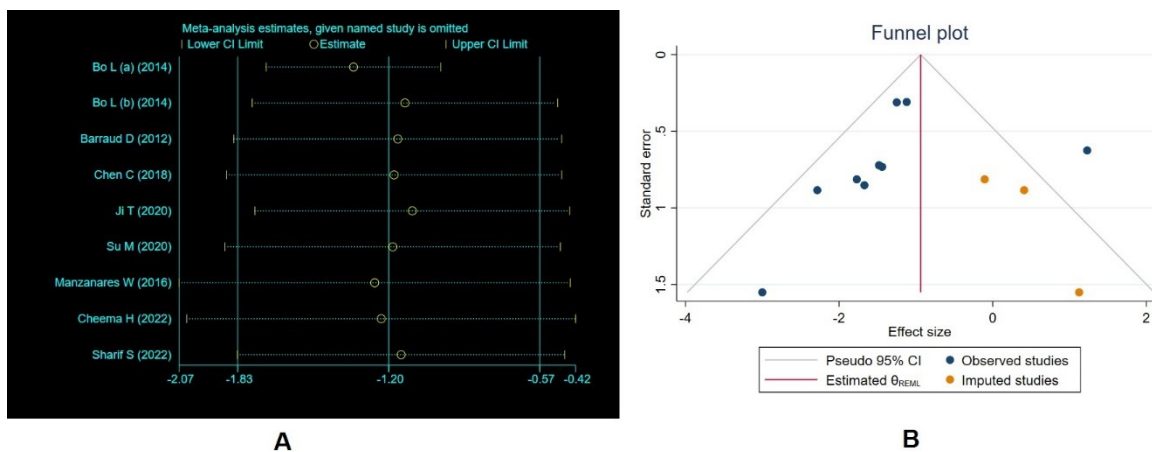

**Supplementary Fig. 4.** Sensitivity analysis regarding the effects of probiotics supplementation on duration of antibiotic use (**A**) and Trim and Fill analysis showing modified pooled WMDs regarding the effects of probiotics supplementation on duration of antibiotic use (**B**).

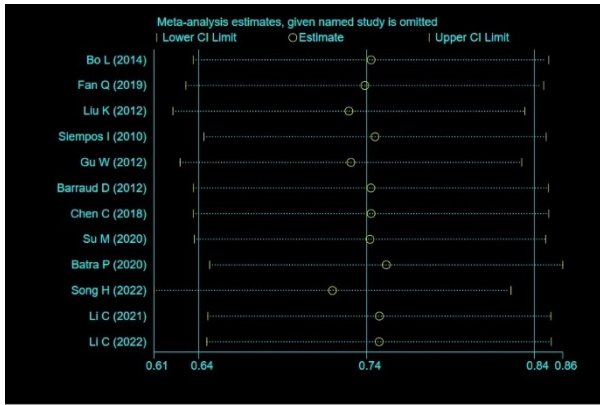

**A**

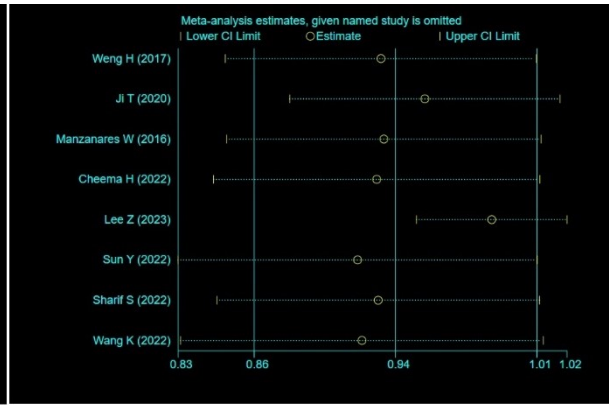

**B**

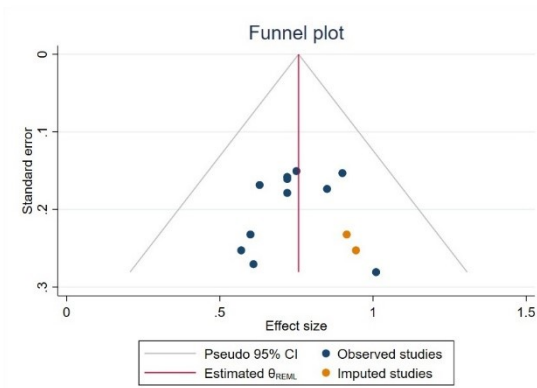

**C**

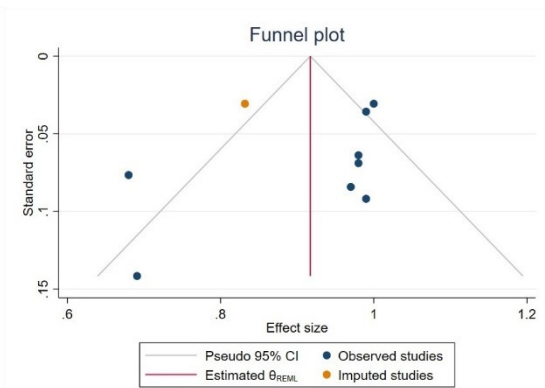

**D**

**Supplementary Fig. 5.** Sensitivity analyses regarding the effects of probiotics supplementation on incidence of diarrhea according to OR (**A**) and RR (**B**) and Trim and Fill analyses showing modified pooled ORs (**C**) and RRs (**D**) regarding the effects of probiotics supplementation on incidence of diarrhea.

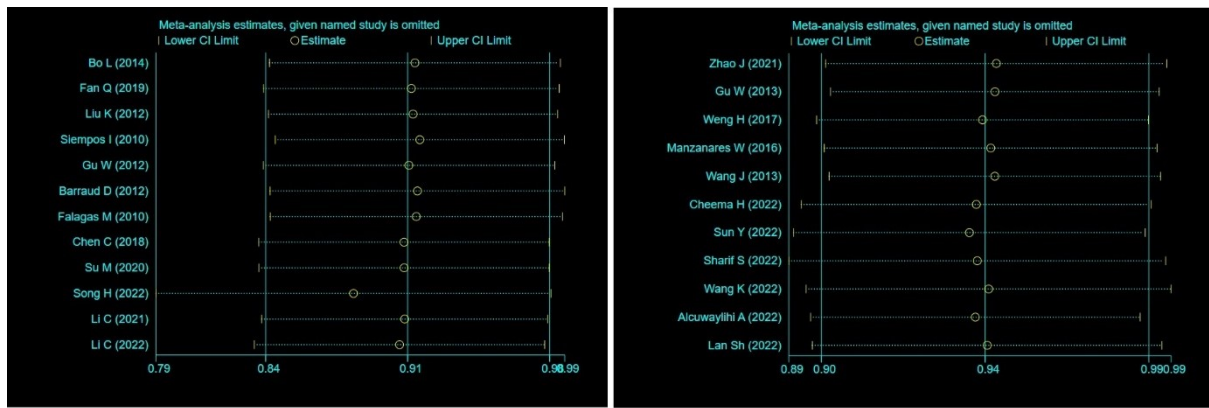

A

B

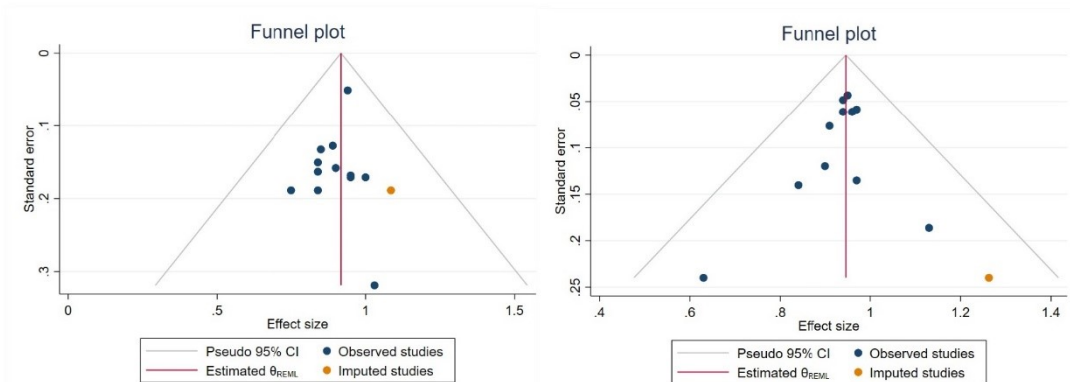

C

D

**Supplementary Fig. 6.** Sensitivity analyses regarding the effects of probiotics supplementation on ICU mortality according to OR (**A**) and RR (**B**) and Trim and Fill analyses showing modified pooled ORs (**C**) and RRs (**D**) regarding the effects of probiotics supplementation on ICU mortality.

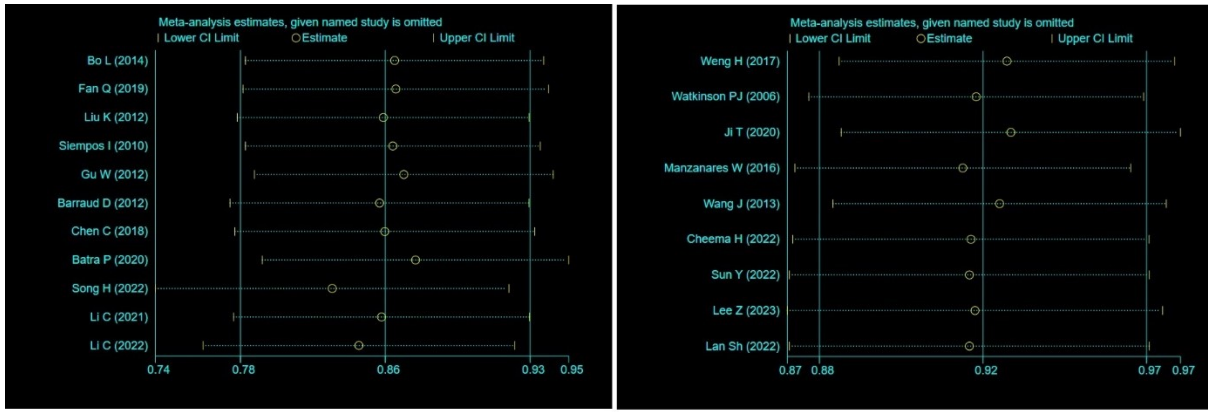

A

B

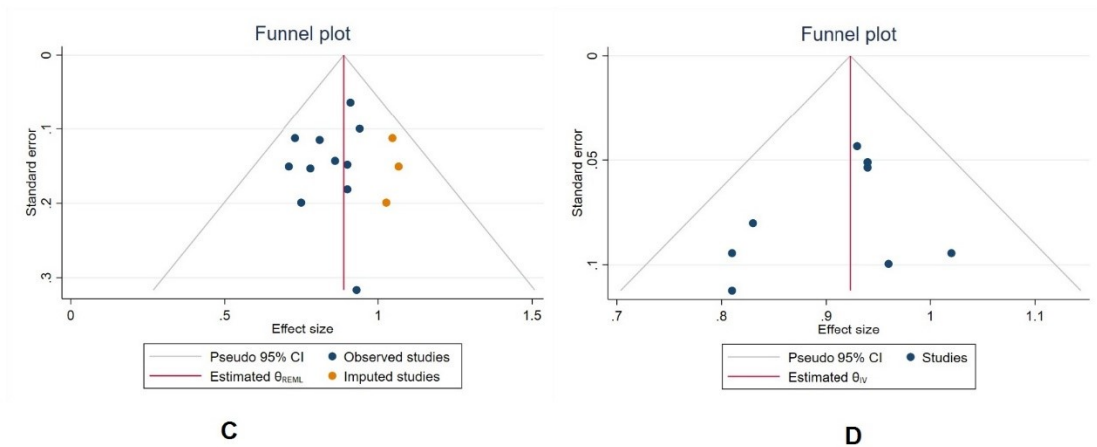

C

D

**Supplementary Fig. 7.** Sensitivity analyses regarding the effects of probiotics supplementation on hospital mortality according to OR (A) and RR (B) and Trim and Fill analyses showing modified pooled ORs (C) and RRs (D) regarding the effects of probiotics supplementation on hospital mortality.

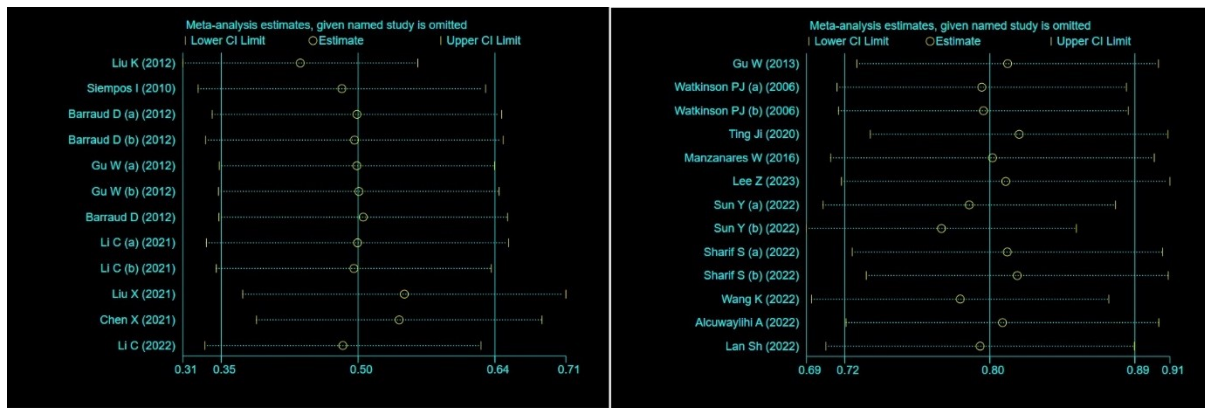

**A**

**B**

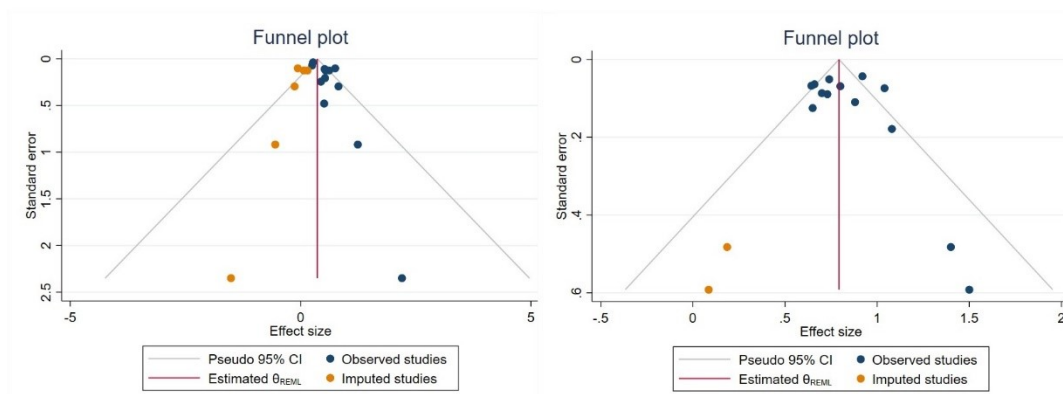

**C**

**D**

**Supplementary Fig. 8.** Sensitivity analyses regarding the effects of probiotics supplementation on nosocomial infections according to OR (**A**) and RR (**B**) and Trim and Fill analyses showing modified pooled ORs (**C**) and RRs (**D**) regarding the effects of probiotics supplementation on nosocomial infections.

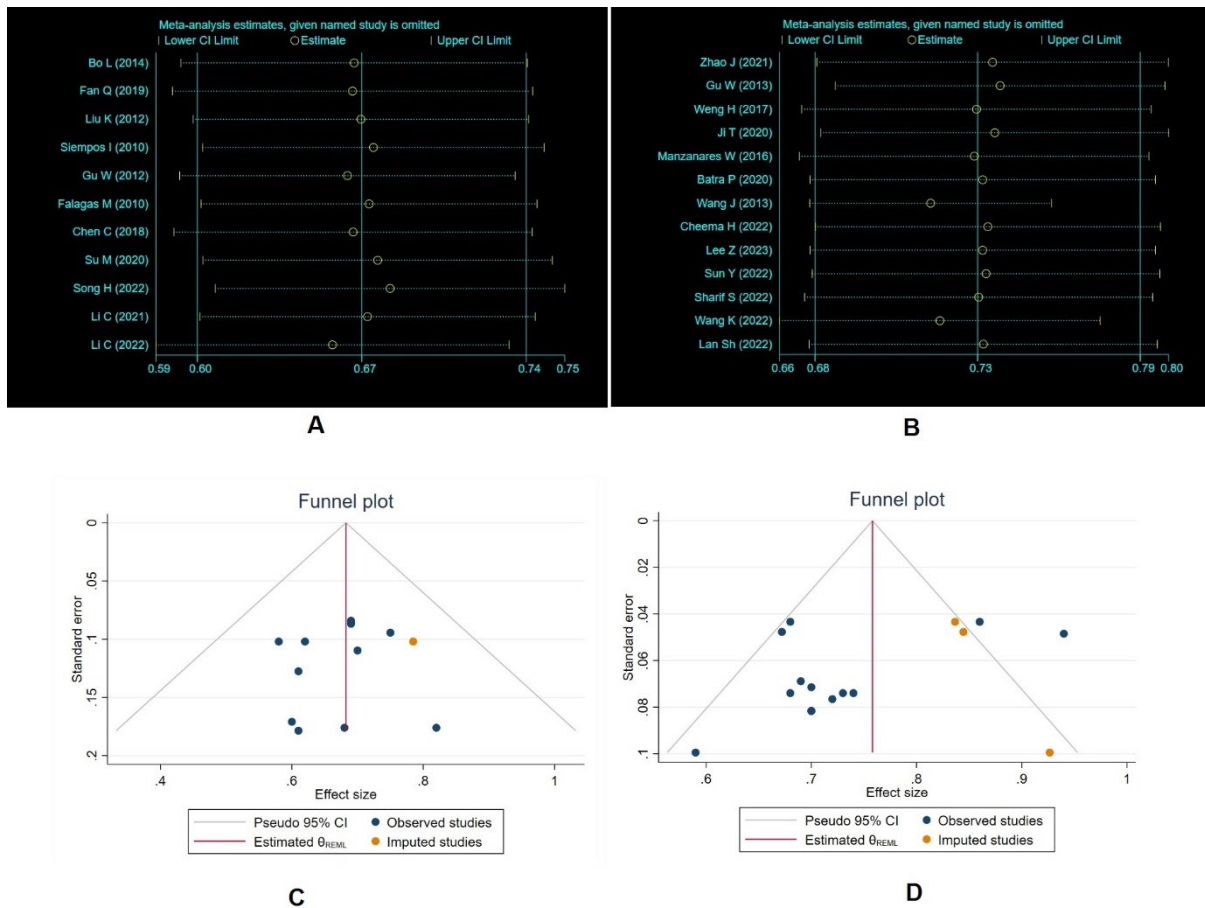

**Supplementary Fig. 9.** Sensitivity analyses regarding the effects of probiotics supplementation on VAP incidence according to OR (**A**) and RR (**B**) and Trim and Fill analyses showing modified pooled ORs (**C**) and RRs (**D**) regarding the effects of probiotics supplementation on VAP incidence.
