# Supplementary material for: The effectiveness of probiotics as an adjunct therapy in patients under mechanical ventilation: an umbrella systematic review and meta-analysis
Source: Royal Society of Chemistry journal article supplement (doi:10.1039/d3fo04653b), 2024-01-01
Supplement: d3fo04653b3.pdf [file d3fo04653b3.pdf]

**Supplementary Table 1. Results of the methodological quality of meta-analysis assessment.**

| Study                   | Q1 | Q2 | Q3 | Q4 | Q5 | Q6 | Q7 | Q8 | Q9 | Q10 | Q11 | Quality score |
|-------------------------|----|----|----|----|----|----|----|----|----|-----|-----|---------------|
| Alsawaylihi et al. 2022 | +  | +  | +  | +  | +  | +  | +  | +  | +  | -   | +   | 10            |
| Barraud et al. 2012     | +  | +  | +  | +  | +  | +  | +  | ?  | +  | +   | +   | 10            |
| Bo et al. 2014          | +  | +  | +  | +  | +  | +  | +  | +  | +  | -   | +   | 10            |
| Batra et al. 2020       | +  | +  | +  | +  | +  | +  | +  | +  | +  | +   | +   | 11            |
| Cheema et al. 2022      | +  | +  | +  | +  | +  | +  | +  | +  | +  | +   | +   | 11            |
| Chen et al. 2018        | +  | +  | +  | -  | +  | +  | +  | +  | +  | -   | +   | 9             |
| Chen et al. 2021        | -  | +  | +  | +  | +  | +  | +  | +  | +  | +   | +   | 10            |
| Falagas et al. 2010     | -  | -  | -  | -  | -  | -  | -  | -  | -  | -   | +   | 1             |
| Fan et al. 2019         | +  | +  | +  | +  | +  | +  | +  | ?  | +  | +   | +   | 10            |
| Gu et al. 2012          | +  | +  | +  | +  | +  | +  | +  | +  | +  | +   | +   | 11            |
| Gu et al. 2013          | +  | +  | +  | +  | +  | +  | +  | +  | +  | -   | -   | 9             |
| Ji et al. 2020          | +  | ?  | +  | +  | +  | +  | +  | +  | +  | +   | +   | 10            |
| Lan et al. 2022         | +  | +  | +  | +  | +  | +  | +  | -  | +  | +   | +   | 10            |
| Lee et al. 2023         | +  | +  | +  | +  | +  | +  | +  | +  | +  | +   | +   | 11            |
| Li et al. 2021          | +  | +  | +  | +  | +  | +  | +  | +  | +  | +   | +   | 11            |
| Li et al. 2022          | +  | +  | +  | +  | +  | +  | +  | +  | +  | +   | +   | 11            |
| Liu et al. 2012         | +  | +  | +  | +  | +  | +  | +  | +  | +  | +   | +   | 11            |
| Liu et al. 2021         | +  | +  | +  | ?  | +  | +  | +  | +  | -  | +   | +   | 9             |
| Manzanares et al. 2016  | +  | ?  | +  | +  | +  | +  | +  | +  | +  | +   | +   | 10            |
| Noshadi et al. 2022     | -  | +  | +  | +  | +  | +  | +  | +  | +  | +   | +   | 10            |
| Sharif et al. 2022      | +  | +  | +  | -  | +  | +  | +  | +  | +  | +   | +   | 10            |
| Siempos et al. 2010     | +  | +  | +  | +  | +  | +  | +  | ?  | +  | -   | +   | 9             |
| Song et al. 2022        | +  | +  | +  | +  | +  | +  | +  | +  | +  | +   | +   | 11            |
| Su et al. 2020          | +  | +  | +  | -  | +  | +  | +  | +  | +  | +   | +   | 10            |
| Sun et al. 2022         | -  | +  | +  | +  | +  | +  | +  | +  | +  | +   | +   | 10            |
| Watkinson et al. 2006   | +  | +  | +  | +  | +  | +  | +  | -  | +  | -   | -   | 8             |
| Wang et al. 2013        | +  | ?  | +  | +  | +  | +  | +  | +  | +  | +   | +   | 10            |
| Wang et al. 2022        | -  | +  | +  | ?  | +  | +  | +  | -  | +  | +   | +   | 8             |
| Weng et al. 2017        | +  | +  | +  | +  | +  | +  | +  | +  | +  | -   | +   | 10            |
| Zhao et al. 2020        | +  | +  | +  | +  | +  | +  | +  | ?  | +  | +   | +   | 10            |

The result of assess the methodological quality using AMSTAR: each item for included studies (? : can't answer; - : means no; + : means yes). **Q1**: Was an ,a priori' design provided?, **Q2**: Was there duplicate study selection and data extraction?, **Q3**: Was a comprehensive literature search (at least two databases) performed?, **Q4**: Was the status of publication (i.e. grey literature) used as an inclusion criterion?, **Q5**: Was a list of studies (included

and excluded) provided?, **Q6:** Were the characteristics of the included studies provided?, **Q7:** Was the scientific quality of the included studies assessed and documented?, **Q8:** Was the scientific quality of the included studies used appropriately in formulation conclusions?, **Q9:** Were the methods used to combine the findings of studies appropriate?, **Q10:** Was the likelihood of publication bias assessed?, **Q11:** Was the conflict of interest included?
