# Supplementary material for: The effectiveness of probiotics as an adjunct therapy in patients under mechanical ventilation: an umbrella systematic review and meta-analysis
Source: Royal Society of Chemistry journal article supplement (doi:10.1039/d3fo04653b), 2024-01-01
Supplement: d3fo04653b4.pdf [file d3fo04653b4.pdf]

**Supplementary Table 2. Search methodology used by each included study.**

| <b>Citation<br/>(First author et al.,<br/>year)</b> | <b>Range of Years of<br/>Included Studies</b> | <b>Medline/PubMed</b> | <b>Embase</b> | <b>Cochrane Central<br/>Registry of Controlled<br/>Trials<br/>(CENTRAL)</b> | <b>Web of Science</b> | <b>Other</b> | <b>Language Limitations</b> |
|-----------------------------------------------------|-----------------------------------------------|-----------------------|---------------|-----------------------------------------------------------------------------|-----------------------|--------------|-----------------------------|
| Alsawaylihi et al. 2022                             | 2011-2020                                     | +                     |               | +                                                                           |                       |              | Yes                         |
| Barraud et al. 2012                                 | 2002-2011                                     | +                     |               | +                                                                           |                       | +            | No                          |
| Bo et al. 2014                                      | 2006-2011                                     | +                     | +             | +                                                                           |                       |              | NR                          |
| Batra et al. 2020                                   | 2010-2020                                     | +                     | +             | +                                                                           | +                     |              | Yes                         |
| Cheema et al. 2022                                  | 2007-2021                                     | +                     | +             | +                                                                           | +                     | +            | NR                          |
| Chen et al. 2018                                    | 2006-2016                                     | +                     |               |                                                                             | +                     |              | NR                          |
| Chen et al. 2021                                    | 2014-2021                                     | +                     | +             | +                                                                           |                       | +            | Yes                         |
| Falagas et al. 2010                                 | 2006-2010                                     | +                     |               | +                                                                           |                       | +            | NR                          |
| Fan et al. 2019                                     | 2006-2016                                     | +                     | +             | +                                                                           | +                     |              | Yes                         |
| Gu et al. 2012                                      | 2008-2011                                     | +                     | +             |                                                                             |                       |              | Yes                         |
| Gu et al. 2013                                      | 2004-2011                                     | +                     | +             |                                                                             |                       |              | No                          |

|                        |           |   |   |   |   |   |     |
|------------------------|-----------|---|---|---|---|---|-----|
| Ji et al. 2020         | 2006-2019 | + | + | + | + | + | No  |
| Lan et al. 2022        | 2006-2022 | + | + | + | + | + | Yes |
| Lee et al. 2023        | 1983-2022 | + | + | + |   | + | No  |
| Li et al. 2021         | 1995-2019 | + | + | + | + | + | No  |
| Li et al. 2022         | 2001-2021 | + | + | + | + |   | No  |
| Liu et al. 2012        | 2002-2011 | + | + | + |   |   | No  |
| Liu et al. 2021        | 2013-2021 | + | + | + | + | + | NR  |
| Manzanares et al. 2016 | 1983-2016 | + | + | + |   | + | No  |
| Noshadi et al. 2022    | 2006-2020 | + | + |   |   | + | Yes |
| Sharif et al. 2022     | 1983-2021 | + | + | + |   | + | No  |
| Siempos et al. 2010    | 2006-2009 | + |   | + |   | + | No  |
| Song et al. 2022       | 2007-2021 | + | + | + |   | + | Yes |
| Su et al. 2020         | 2006-2019 | + | + | + |   |   | NR  |
| Sun et al. 2022        | 2007-2021 | + | + | + |   |   | No  |

|                       |           |   |   |   |   |   |     |
|-----------------------|-----------|---|---|---|---|---|-----|
| Watkinson et al. 2006 | 1995-2006 | + | + | + |   | + | Yes |
| Wang et al. 2013      | 2008-2010 | + |   | + | + | + | No  |
| Wang et al. 2022      | 1997-2021 | + | + | + | + | + | NR  |
| Weng et al. 2017      | 2007-2016 | + | + | + |   |   | No  |
| Zhao et al. 2020      | 2007-2019 | + | + | + |   | + | No  |

NR, not reported.
